# Supplementary material for: Cytotoxicity, acute and sub-chronic toxicities of the fruit extract of Tetrapleura tetraptera (Schumm. & Thonn.) Taub. (Fabaceae)
Source: BMC Complement Med Ther. 2022 Jul 4;22:178. doi: 10.1186/s12906-022-03659-1 (PMC9252075; doi:10.1186/s12906-022-03659-1)

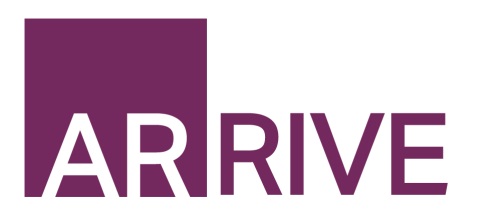


The ARRIVE Guidelines Checklist

Animal Research: Reporting In Vivo Experiments

Carol Kilkenny1, William J Browne2, Innes C Cuthill3, Michael Emerson4 and Douglas G Altman5

*1The National Centre for the Replacement, Refinement and Reduction of Animals in Research, London, UK, 2School of Veterinary Science, University of Bristol, Bristol, UK, 3School of Biological Sciences, University of Bristol, Bristol, UK, 4National Heart and Lung Institute, Imperial College London, UK, 5Centre for Statistics in Medicine, University of Oxford, Oxford, UK.*

|  | ITEM | RECOMMENDATION | Section/ Paragraph | |
| --- | --- | --- | --- | --- |
| 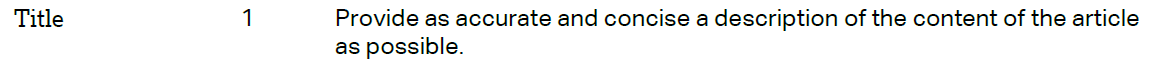 | | | | 1. Title | |
| 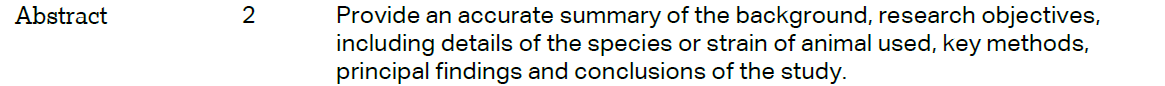 | | | | 2. Abstract | |
| INTRODUCTION | | | |  | |
| 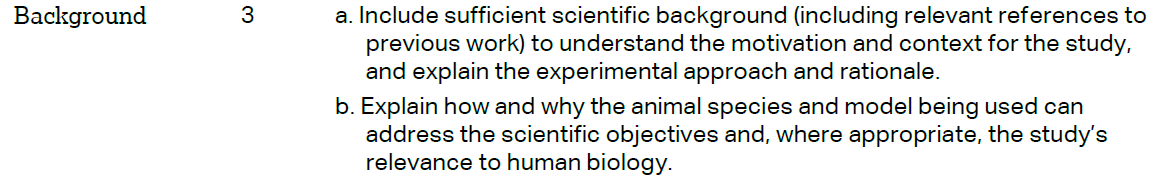 | | | | 3a. Background, Paragraph 1  3b Background, Paragraph 2 | |
| 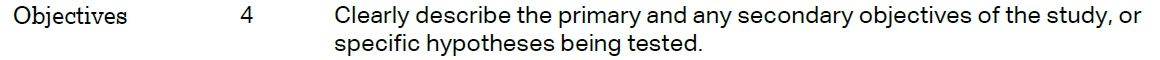 | | | | 4. Objective, Last paragraph | |
| METHODS | | | |  | |
| 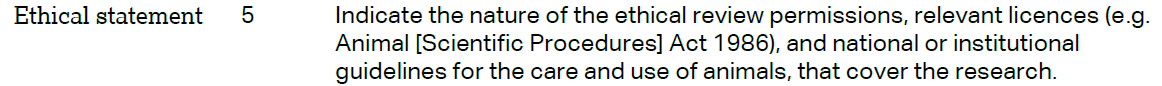 | | | | 5. Methods section, experimental animals’ subsection | |
| 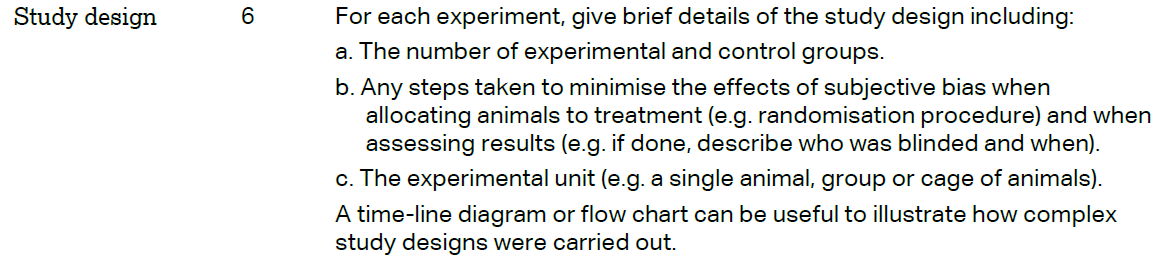 | | | | 6a. Methods section, acute oral toxicity study subsection, study of sub-chronic oral toxicity subsection  6b. Methods section   - Acute oral toxicity study subsection - Study of sub-chronic oral toxicity subsection - Hematological parameters subsection - Biochemical parameters subsection - Histological analysis subsection   6c. Methods section   - Acute oral toxicity study subsection (5 females’ rats for the test group and 5 females’ rats for the control group) - Study of sub-chronic oral toxicity subsection (4 groups of 8 animals per group: 4 females and 4 males). | |
| 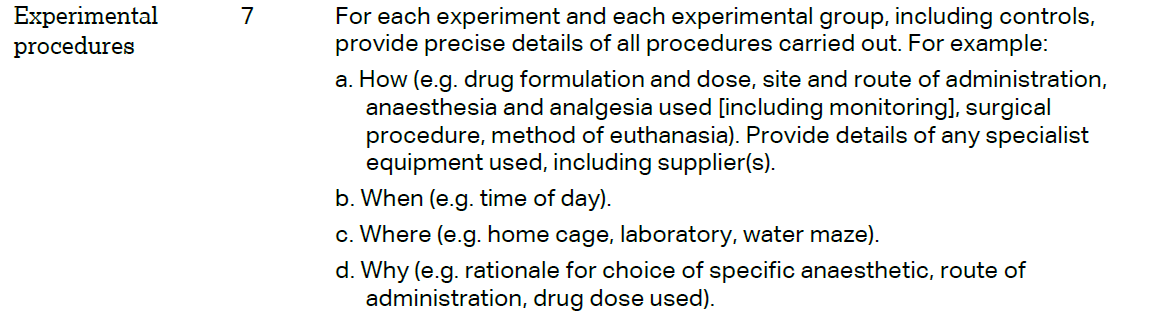 | | | | 7a. Methods section   - Acute oral toxicity study subsection - Study of sub-chronic oral toxicity subsection   7b. Methods section   - Acute oral toxicity study subsection - Study of sub-chronic oral toxicity subsection   7c. Methods section, experimental animals’ subsection  7d. Methods section   - Acute oral toxicity study subsection - Study of sub-chronic oral toxicity subsection | |
| 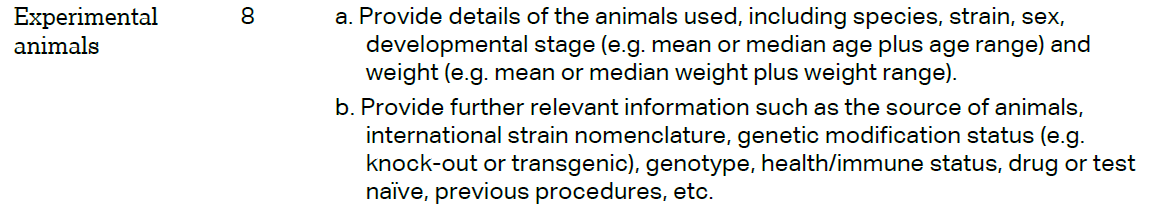 | | | | 8a. Methods section   - Acute oral toxicity study subsection - Study of sub-chronic oral toxicity subsection   8b. Methods section, Acute oral toxicity study subsection (animals) | |

The ARRIVE guidelines. Originally published in *PLoS Biology*, June 20101

| 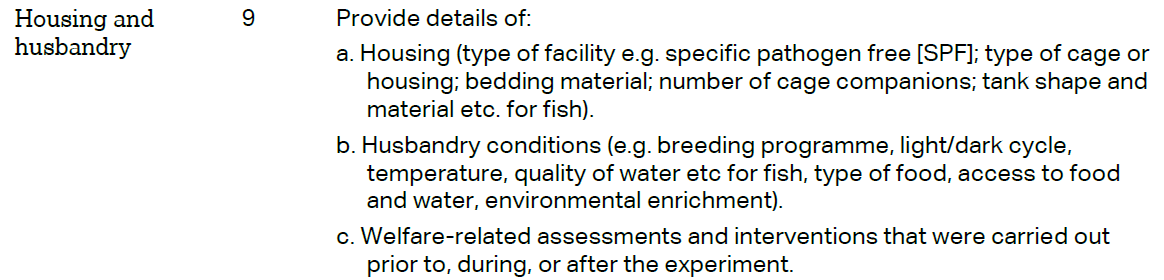 | 9a. Methods section   - Acute oral toxicity study subsection - Sub-chronic oral toxicity study subsection   9b. Methods section, experimental animals’ subsection  9c. Methods section: Acute oral toxicity study subsection and Study of sub-chronic oral toxicity subsection | |
| --- | --- | --- |
| 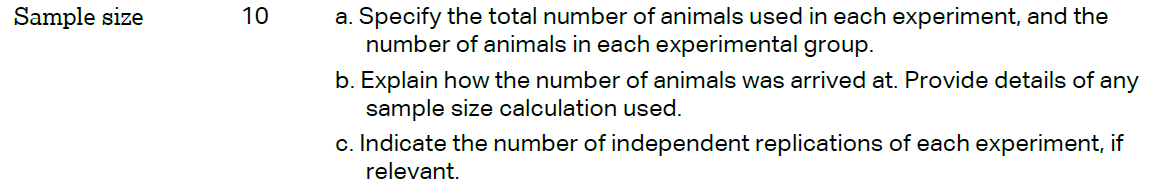 | 10a. Method section   - Methods section: Acute oral toxicity study subsection and Study of sub-chronic oral toxicity subsection   10b. Methods section  10c. Methods section   - Acute oral toxicity study subsection - Study of sub-chronic oral toxicity   subsection | |
| 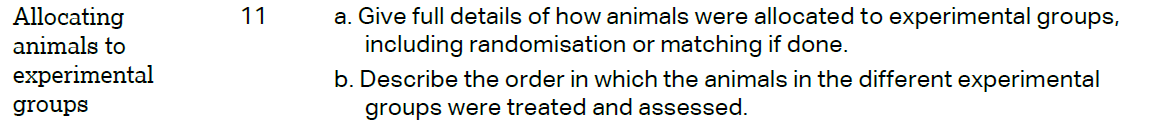 | 11a. Methods section   - Experimental animals - Acute oral toxicity study subsection - Study of sub-chronic oral toxicity subsection   11b. Methods section   - Acute oral toxicity study subsection - Study of sub-chronic oral toxicity subsection | |
| 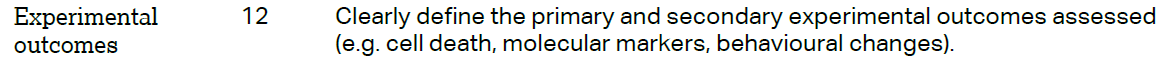 | 12. Methods section   - Acute oral toxicity study subsection - Study of sub-chronic oral toxicity subsection - Assessment of Hematological parameters subsection - Assessment of Biochemical parameters subsection - Histological analysis subsection | |
| 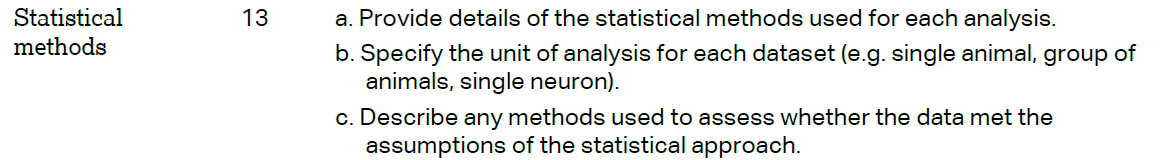 | 13a. Methods section: statistical analysis subsection  13b. Methods section: statistical analysis subsection  13c. Methods section: statistical analysis subsection | |
| RESULTS |  | |
| 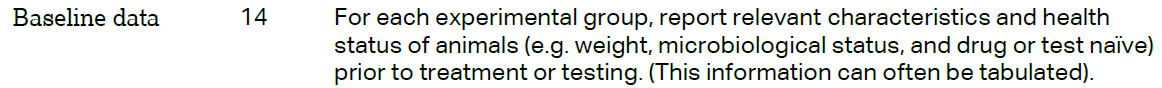 | 14. Results section, Tables 2-6 (dose in mg/kg); Figures 2 and 3 | |
| 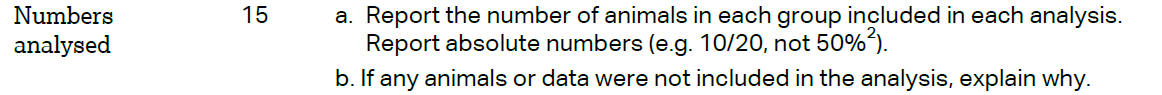 | 15a. Throughout results Section  15b. Not applicable | |
| 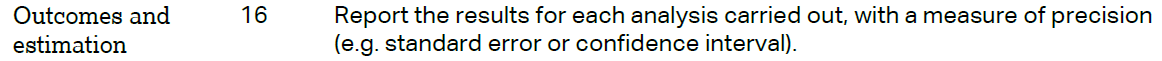 | 16. Results section, Tables 2-6; Figure 2-6 | |
| 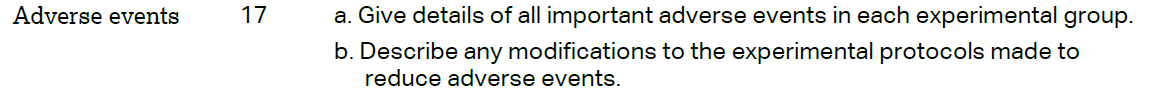 | 17. Not applicable | |
| DISCUSSION |  | |
| 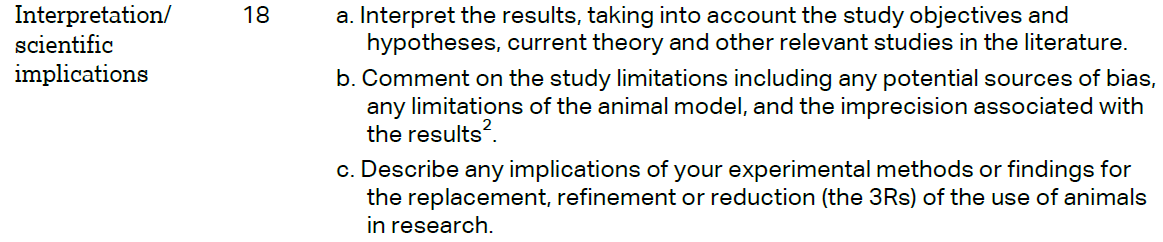 | 18. Throughout Discussion Section | |
| 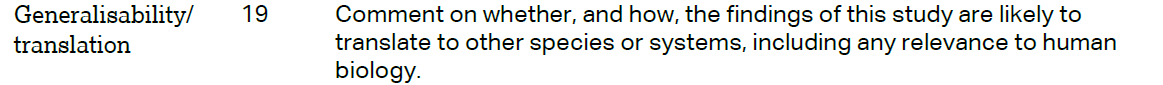 | 19. Not applicable | |
| 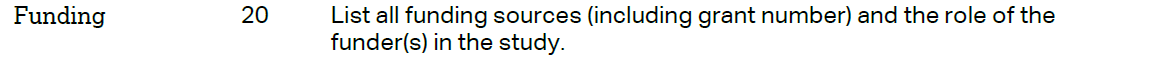 | | 20. No funding |


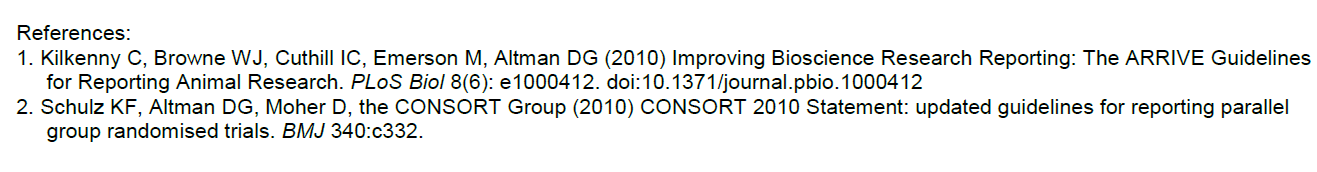

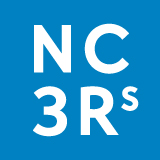

Supplement: Supplementary file 2 — Additional file 2. [file 12906_2022_3659_MOESM2_ESM.docx]
